# Supplementary material
Source: PubMed Central journal article supplement (PMC8364753)
Supplement: NIHMS1728014-supplement-Suppporting_Material.pdf [file NIHMS1728014-supplement-Suppporting_Material.pdf]

## Supporting Information

# Enzyme-substrate-cofactor dynamical networks revealed by high resolution field cycling relaxometry

*Masha M. Rosenberg<sup>‡,1</sup>, Tianjiong Yao<sup>‡,2</sup>, Gregory C. Patton<sup>‡,3</sup>, Alfred G. Redfield<sup>§,4</sup>, Mary F. Roberts<sup>¶\*</sup> and Lizbeth Hedstrom<sup>‡,‡\*</sup>*

From the <sup>‡</sup>Department of Biology, Brandeis University, MS009, 415 South St., Waltham MA 02453-9110 USA

<sup>§</sup>Department of Biochemistry, Brandeis University, MS009, 415 South Street, Waltham, MA 02453-9110 USA

<sup>¶</sup>Department of Chemistry, Boston College, 140 Commonwealth Avenue, Chestnut Hill, MA 02467-9110 USA

<sup>‡</sup>Department of Chemistry, Brandeis University, 415 South Street, Waltham, MA 02453-3808 USA.

1. Current address: Pantheon BioSciences, Kishon 18, Yavne 8122004, Israel
2. Current address: Department of Chemistry, University of Illinois at Urbana-Champaign, 137 Roger Adams Laboratory, 600 S. Mathews Avenue, Urbana, IL 61801 USA
3. Current address: New England Biolabs, Inc. , 240 County Road, Ipswich, MA 01938
4. Deceased July 24, 2019.

\* To whom correspondence should be addressed: Lizbeth Hedstrom, Department of Biology, Brandeis University, MS009, 415 South Street, Waltham, MA 02453-9110 USA. Tel: 781-736-2333; Fax: 781-736-2349; E-mail: [hedstrom@brandeis.edu](mailto:hedstrom@brandeis.edu); Mary Roberts, Department of Chemistry, Boston College, 140 Commonwealth Avenue, Chestnut Hill, MA 02467-9110. Tel: 617-460-5194; E-mail: [mary.roberts@bc.edu](mailto:mary.roberts@bc.edu).

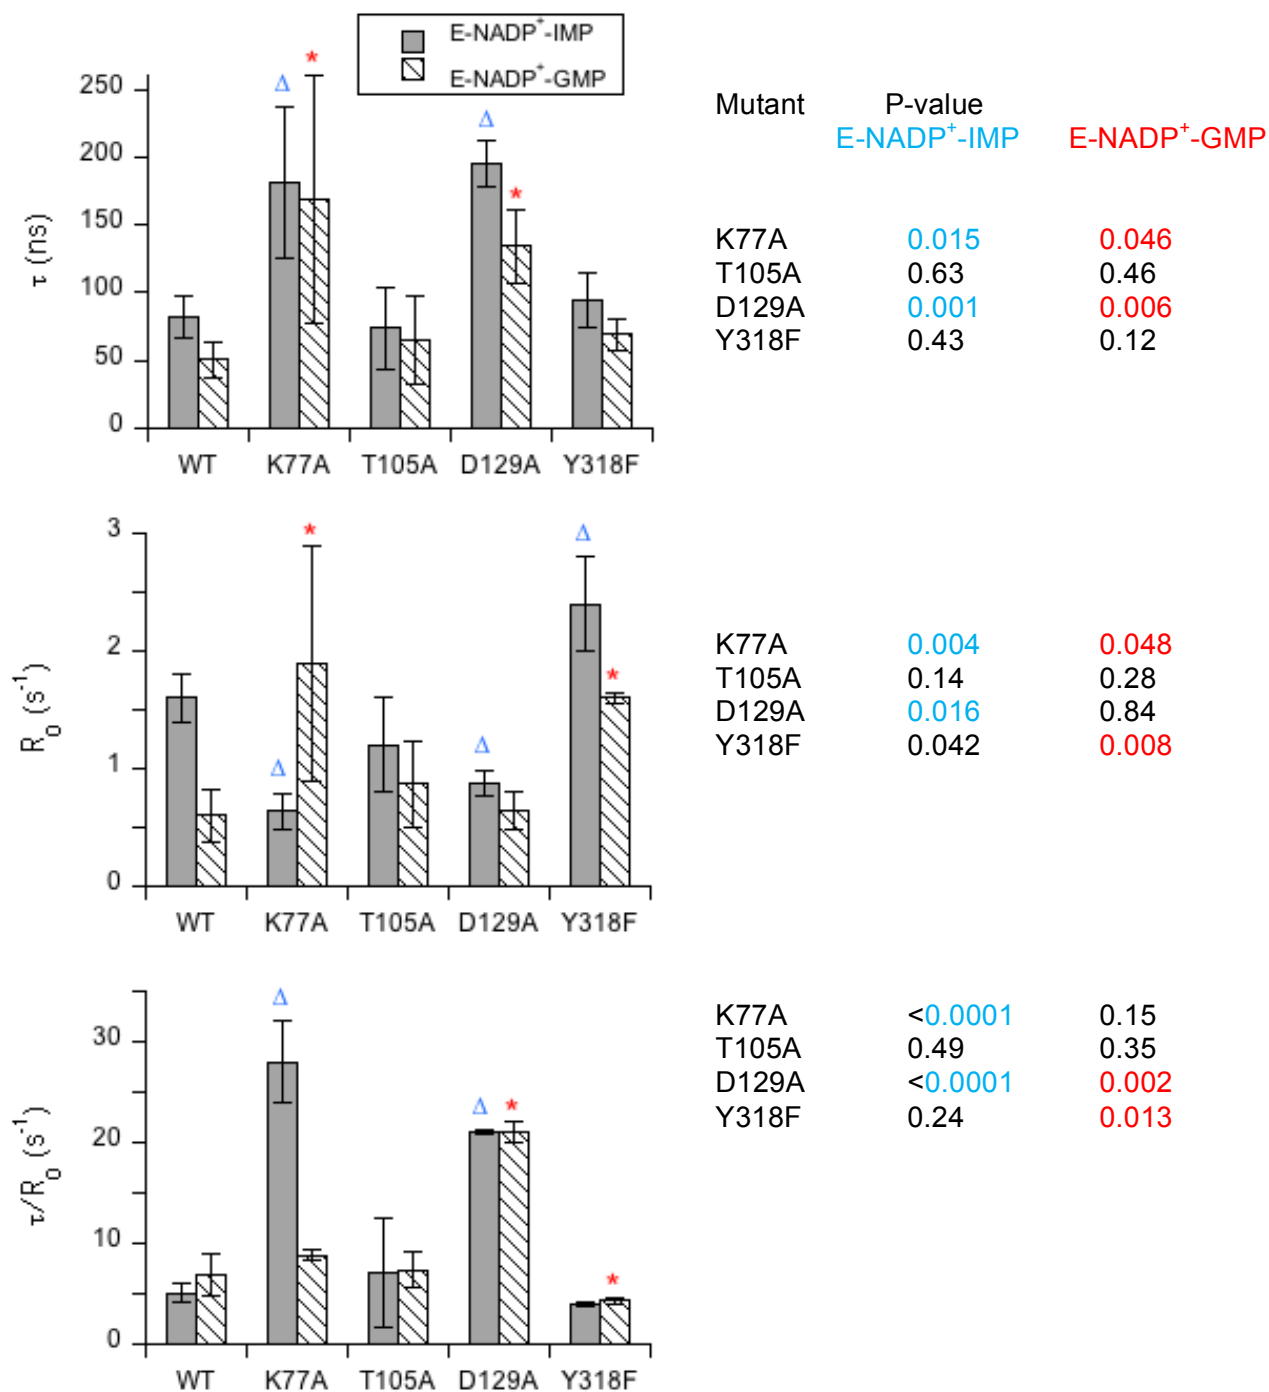

**Figure S1. <sup>31</sup>P field cycling parameters extracted for NADP<sup>+</sup> PP-2 compared to those for WT GMPR.** P-value is from an unpaired t-test and comparisons with P<0.05 indicates the WT and mutant values are different. The parameters for this diphosphate nucleus are similar to those for PP-1 (in Figure 2).

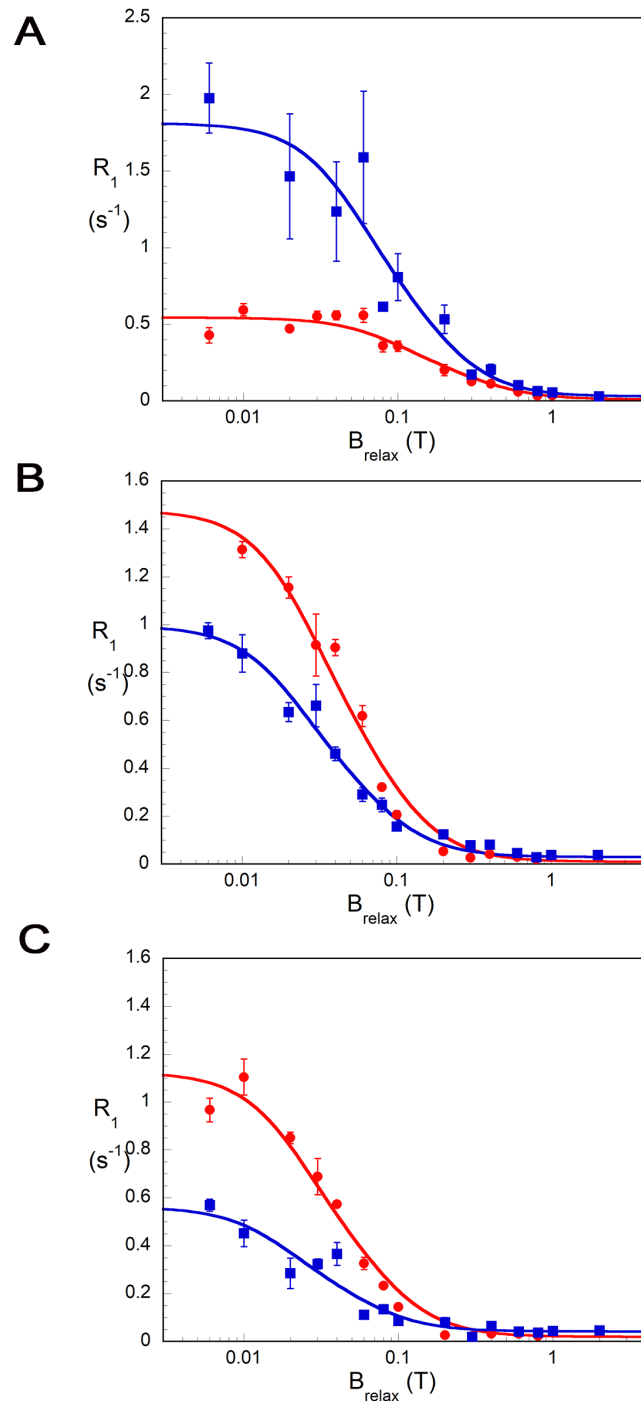

**Figure S2. Magnetic field dependence of substrate and cofactor  $^{31}\text{P}$   $R_1$  in  $\text{K77A}\cdot\text{GMP}\cdot\text{NADP}^+$  and  $\text{K77A}\cdot\text{IMP}\cdot\text{NADP}^+$  complexes.** Samples ( $\text{K77A}\cdot\text{GMP}\cdot\text{NADP}^+$  in *red* and  $\text{K77A}\cdot\text{IMP}\cdot\text{NADP}^+$  in *blue*) contained 400  $\mu\text{M}$  enzyme and 1.6 mM GMP/IMP and 1.6 mM  $\text{NADP}^+$  in 75 mM Tris-HCl, pH 7.8, 100 mM KCl, 1 mM DTT and 0.5 mM EDTA: (A) substrate monophosphate, (B) cofactor monophosphate, and (C) cofactor diphosphates. The error bars are the standard error in  $R_1$  from the exponential fit of signal magnitude versus time spent at the low field. The data shown are for one of the three independent experiments.

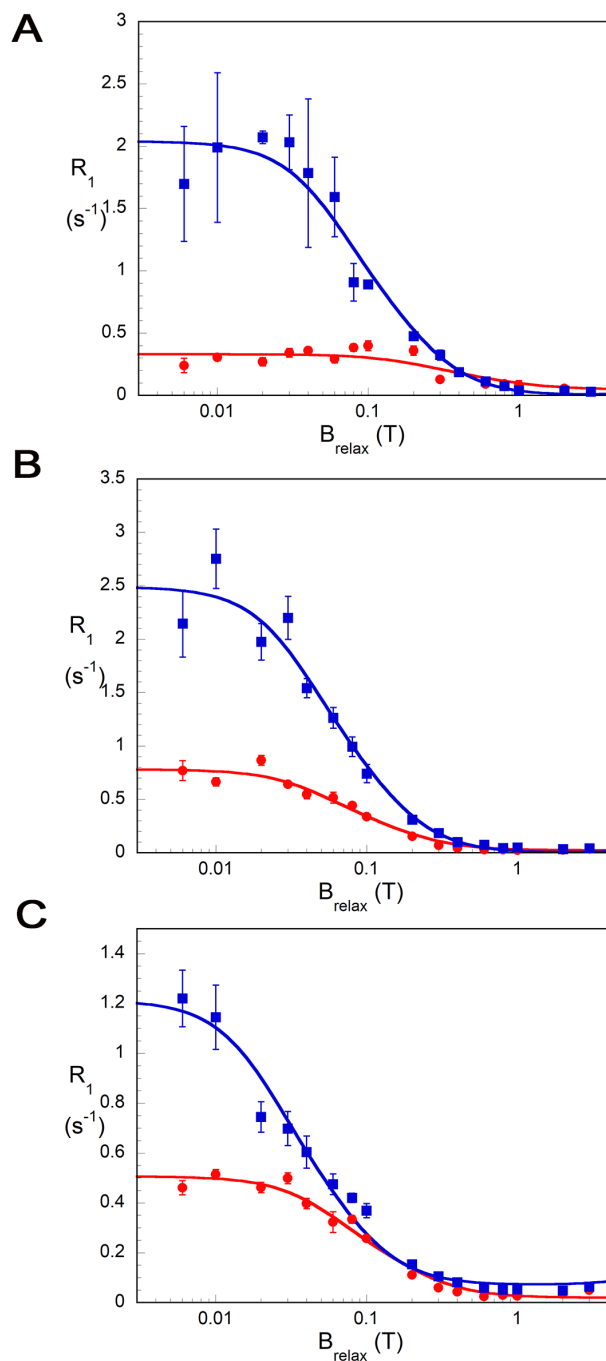

**Figure S3. Magnetic field dependence of substrate and cofactor  $^{31}\text{P}$   $R_1$  in T105A•GMP•NADP<sup>+</sup> and T105A•IMP•NADP<sup>+</sup> complexes.** Samples (T105A•GMP•NADP<sup>+</sup> in *red* and T105A•IMP•NADP<sup>+</sup> in *blue*) contained 400  $\mu\text{M}$  enzyme and 1.6 mM GMP/IMP and 1.6 mM NADP<sup>+</sup> in 75 mM Tris-HCl, pH 7.8, 100 mM KCl, 1 mM DTT and 0.5 mM EDTA: (A) substrate monophosphate, (B) cofactor monophosphate, and (C) cofactor diphosphates. The error bars are the standard error in  $R_1$  from the exponential fit of signal magnitude versus time at low field. The data shown are for one of the three independent experiments.

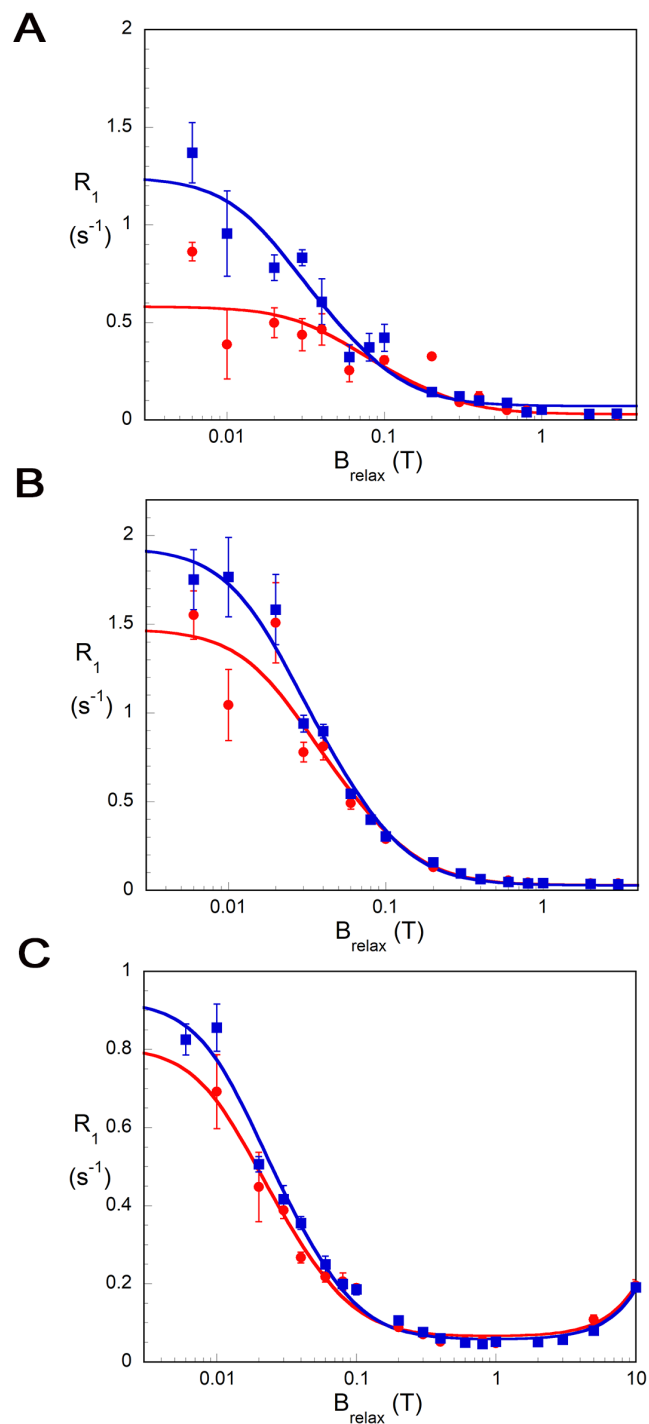

**Figure S4. Magnetic field dependence of substrate and cofactor  $^{31}\text{P}$   $R_1$  in D129A•GMP•NADP<sup>+</sup> and D129A•IMP•NADP<sup>+</sup> complexes.** Samples (D129A•GMP•NADP<sup>+</sup> in *red* and D129A•IMP•NADP<sup>+</sup> in *blue*) contained 400  $\mu\text{M}$  enzyme and 1.6 mM GMP/IMP and 1.6 mM NADP<sup>+</sup> in 75 mM Tris-HCl, pH 7.8, 100 mM KCl, 1 mM DTT and 0.5 mM EDTA: (A) substrate monophosphate, (B) cofactor monophosphate, and (C) cofactor diphosphates. The error bars are the standard error in  $R_1$  from the exponential fit of signal magnitude versus time spent at low field. The data shown are for one of two independent experiments for the hydride transfer complex and for the single experiment for the deamination complex.

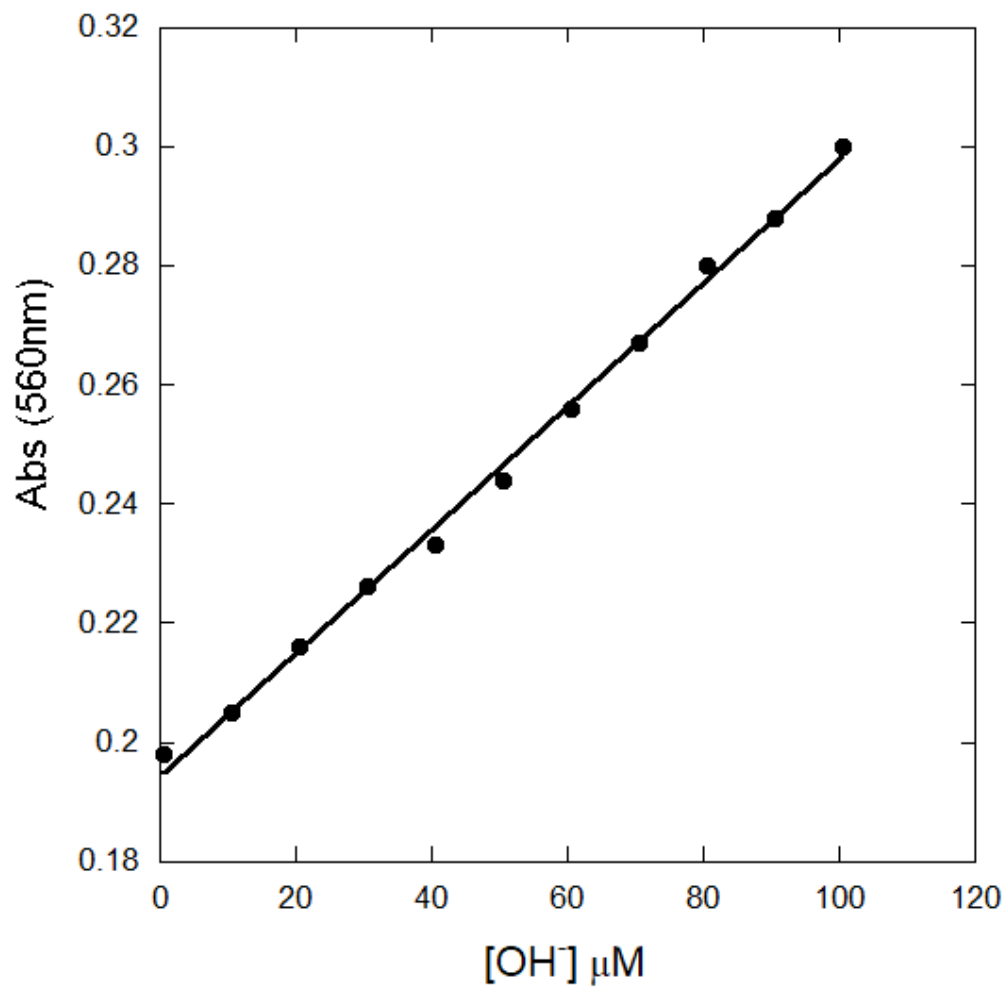

**Figure S5. Standard curve for H<sup>+</sup> uptake experiments.** The change in absorbance is 0.001/ $\mu\text{M H}^+$ .

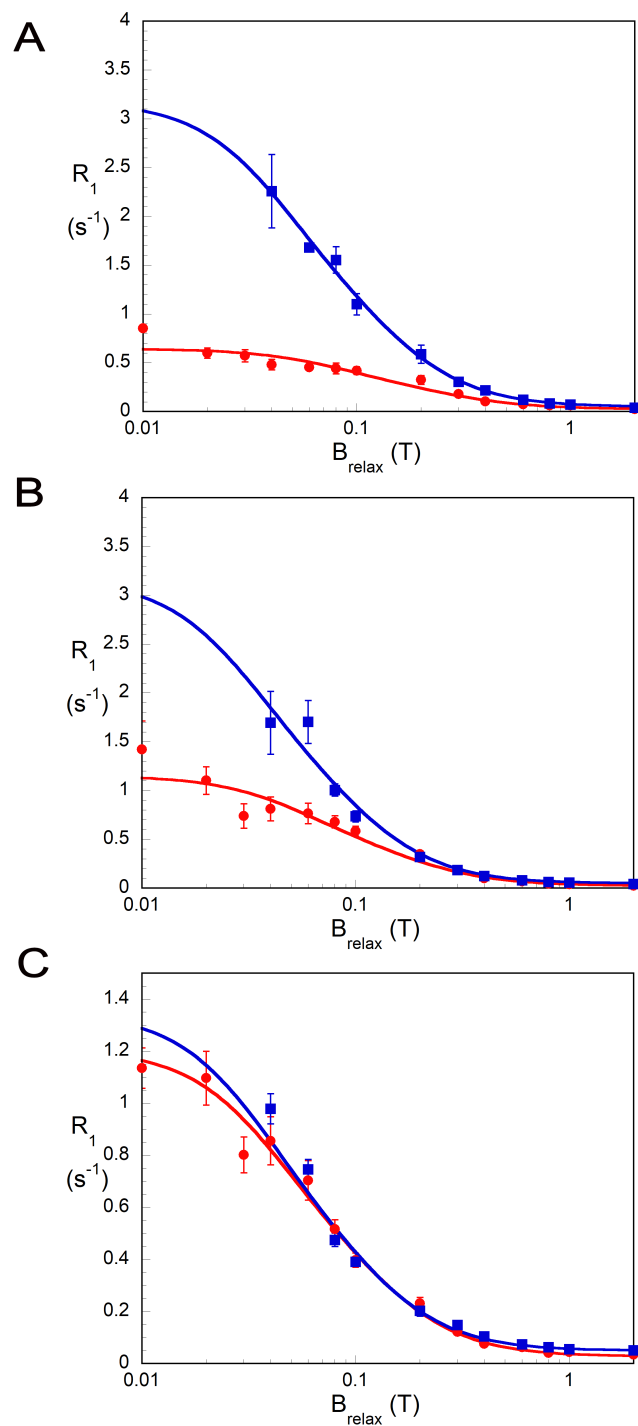

**Figure S6. Magnetic field dependence of substrate and cofactor  $^{31}\text{P}$   $R_1$  in Y318F•GMP•NADP $^+$  and Y318F•IMP•NADP $^+$  complexes.** Samples (Y318F•GMP•NADP $^+$  in *red* and Y318F•IMP•NADP $^+$  in *blue*) contained 400  $\mu\text{M}$  enzyme and 1.6 mM GMP/IMP and 1.6 mM NADP $^+$  in 75 mM Tris-HCl, pH 7.8, 100 mM KCl, 1 mM DTT and 0.5 mM EDTA: (A) substrate monophosphate, (B) cofactor monophosphate, and (C) cofactor diphosphates. The error bars are the standard error in  $R_1$  from the exponential fit of signal magnitude versus time spent at low field. The data shown are for one of the two independent experiments.

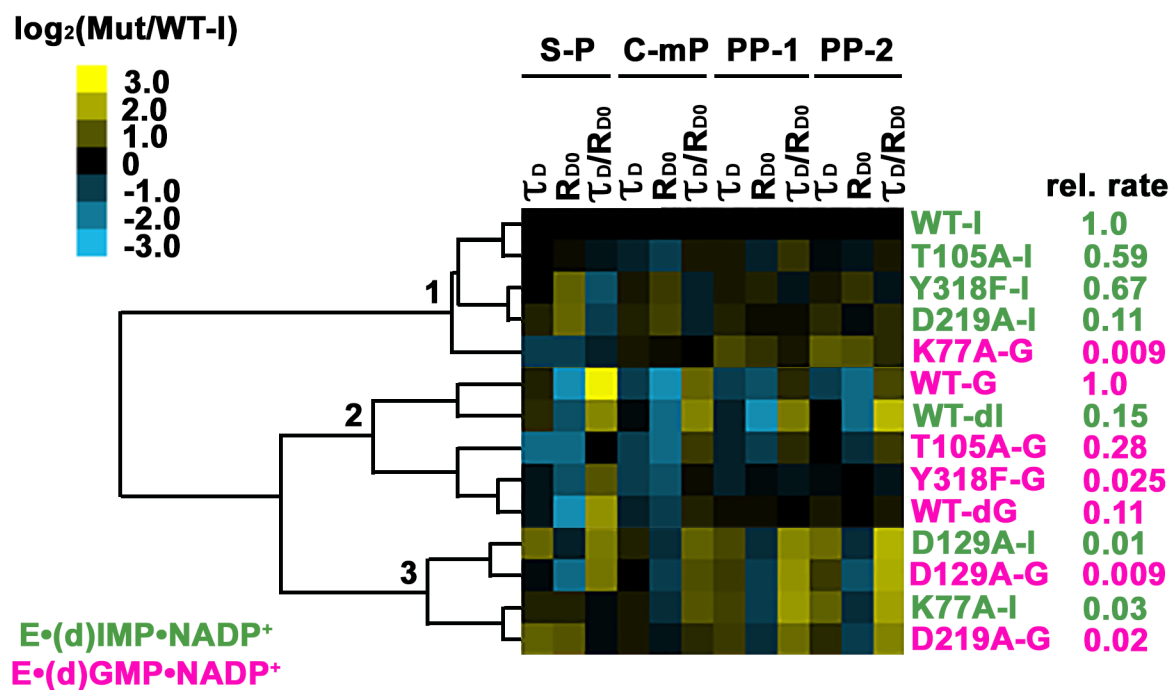

**Figure S7. Heat map of cluster analysis.** Field cycling parameters were expressed as the ratio of mutant to wild-type hydride transfer complex and converted to  $\log_2$ . Hydride transfer complexes are green, deamination complexes are magenta. Relative rates compared to the relevant wild-type complex are shown, for the partial hydride transfer in green and the back reaction in magenta. Enzyme complexes were clustered using Euclidean distance algorithm with centroid linkages in Cluster 3.0<sup>1</sup>. Results were visualized using Tree View<sup>2</sup>. S-P, substrate monophosphate; C-mP, cofactor monophosphate; PP-1, cofactor diphosphate 1; PP-2, cofactor diphosphate 2.



**Table S1. Field cycling parameters for substrate in mutant NADP<sup>+</sup> complexes.** Values are the average of three independent experiments unless otherwise noted.

| <sup>31</sup> P  | Enzyme             | Hydride transfer complex (IMP+NADP <sup>+</sup> ) |                                       |                                                    | Deamination complex (GMP+NADP <sup>+</sup> ) |                                   |                                                    |
|------------------|--------------------|---------------------------------------------------|---------------------------------------|----------------------------------------------------|----------------------------------------------|-----------------------------------|----------------------------------------------------|
|                  |                    | $\tau_D$<br>(ns)                                  | $R_{D0}$<br>(s <sup>-1</sup> )        | $\tau_D/R_{D0}$<br>$\times 10^8$ (s <sup>2</sup> ) | $\tau_D$<br>(ns)                             | $R_{D0}$<br>(s <sup>-1</sup> )    | $\tau_D/R_{D0}$<br>$\times 10^8$ (s <sup>2</sup> ) |
| Substrate mono-P | WT                 | 55±12                                             | 1.8±0.9                               | 3.3±1.2                                            | 72±13                                        | 0.3±0.02                          | 24±5                                               |
|                  | K77A <sup>a</sup>  | 74±23                                             | 2.4±0.7                               | 3.1±0.3                                            | 26±1                                         | 0.64±0.16                         | 4.1±1.1                                            |
|                  | T105A              | 55±14                                             | 2.1±0.5                               | 2.7±1.2                                            | 16±5 <sup>a</sup>                            | 0.4±0.3 <sup>a</sup>              | 3.4±0.8 <sup>a</sup>                               |
|                  | D129A <sup>a</sup> | 126±20                                            | 1.4±0.7                               | 10±6                                               | 48±18 <sup>b</sup>                           | 0.6±0.1 <sup>b</sup>              | 8.7±0.4 <sup>b</sup>                               |
|                  | Y318F              | 55±3 <sup>a</sup>                                 | 4.0±1.6 <sup>a</sup>                  | 1.4±0.6 <sup>a</sup>                               | 46±13                                        | 0.7±0.1                           | 6.5±1.3                                            |
| NADP mono-P      | WT                 | 103±23                                            | 2.8±0.2                               | 3.8±1.0                                            | 47±11                                        | 0.6±0.1                           | 7.5±2.8                                            |
|                  | K77A               | 124±14                                            | 1.1±0.2<br>(1.6±0.3) <sup>c</sup>     | 11±1<br>(7.7±0.7) <sup>c</sup>                     | 121±35                                       | 2.0±0.8<br>(3.2±1.3) <sup>d</sup> | 6.1±0.5<br>(3.8±0.8) <sup>d</sup>                  |
|                  | T105A              | 67±18                                             | 1.5±0.7                               | 5.0±2.4                                            | 49±1 <sup>a</sup>                            | 0.79±0.03 <sup>a</sup>            | 6.2±0.4 <sup>a</sup>                               |
|                  | D129A <sup>a</sup> | 131±28                                            | 1.6±0.5                               | 8.6±1.0                                            | 100±2                                        | 1.42±0.03                         | 7.1±0.3                                            |
|                  | Y318F              | 118±29 <sup>a</sup>                               | 4.6±1.5 <sup>a</sup>                  | 2.6±0.2 <sup>a</sup>                               | 49±5                                         | 1.2±0.1                           | 4.1±0.1                                            |
| NADP PP1         | WT                 | 88±5                                              | 1.4±0.3                               | 6.6±1.2                                            | 44±6                                         | 0.49±0.11                         | 9.5±2.1                                            |
|                  | K77A               | 147±31                                            | 0.44±0.06<br>(0.65±0.09) <sup>c</sup> | 28±18<br>(19±12) <sup>c</sup>                      | 161±58                                       | 1.3±0.3<br>(2.1±0.5) <sup>d</sup> | 12.5±2.1<br>(7.8±1.3) <sup>d</sup>                 |
|                  | T105A              | 102±14                                            | 0.99±0.47                             | 12±6                                               | 56±15 <sup>a</sup>                           | 0.64±0.16 <sup>a</sup>            | 8.8±0.7 <sup>a</sup>                               |
|                  | D129A <sup>a</sup> | 160±1                                             | 0.79±0.11                             | 20±3                                               | 142±40                                       | 0.66±0.11                         | 21±2                                               |
|                  | Y318F              | 102±11                                            | 1.8±0.2                               | 5.58±0.02                                          | 61±9                                         | 1.2±0.2                           | 5.0±0.6                                            |
| NADP PP2         | WT                 | 82±15                                             | 1.6±0.2                               | 5.1±1.0                                            | 51±13                                        | 0.60±0.22                         | 8.9±2.0                                            |
|                  | K77A <sup>a</sup>  | 181±56                                            | 0.64±0.15<br>(0.95 ± 22) <sup>c</sup> | 28±4<br>(19±2.7) <sup>c</sup>                      | 169±91                                       | 1.9±1.0<br>(3.1±1.6) <sup>d</sup> | 8.8±0.5<br>(5.4±0.3) <sup>d</sup>                  |
|                  | T105A              | 74±30                                             | 1.2±0.4                               | 7.1±5.5                                            | 65±33 <sup>a</sup>                           | 0.87±0.37 <sup>a</sup>            | 7.4±1.8 <sup>a</sup>                               |
|                  | D129A <sup>a</sup> | 195±17                                            | 0.88±0.11                             | 21±2                                               | 134±27                                       | 0.64±0.16                         | 21±1                                               |
|                  | Y318F              | 95±20 <sup>a</sup>                                | 2.4±0.4 <sup>a</sup>                  | 4.0±0.2 <sup>a</sup>                               | 69±12                                        | 1.6±0.04                          | 4.3±0.4                                            |

<sup>a</sup> The number of experiments, N, was 2.

<sup>b</sup> Of two field cycling runs for this complex, only one had sufficient data to extract GMP  $t$  and  $R_{D0}$ . The errors for the D129A GMP parameters are from the goodness of fit of the field cycling data for that one sample. The NADP<sup>+</sup> resonances were measurable in both samples so that for all the D129A cofactor parameters the error is the variance from the mean of the two samples.

<sup>c</sup> Adjusted for  $F_b(\text{NADP}) = 0.67$

<sup>d</sup> Adjusted for  $F_b(\text{NADP}) = 0.62$

**Table S2. Comparisons of mutant protein  $\tau_D$ ,  $R_{D0}$ , and  $\tau_D/R_{D0}$   $^{31}\text{P}$  parameters in the hydride transfer (HT), E-NADP<sup>+</sup>-IMP, and deamination (DA) E-NADP<sup>+</sup>-GMP complexes. <sup>a</sup>**

| GMPR <sup>b</sup>              | $\tau_D$                                                                                                              | $R_{D0}$                                                                             | $\tau_D/R_{D0}$                                                                             |
|--------------------------------|-----------------------------------------------------------------------------------------------------------------------|--------------------------------------------------------------------------------------|---------------------------------------------------------------------------------------------|
| <i>Substrate:</i>              |                                                                                                                       |                                                                                      |                                                                                             |
| K77A                           | $\tau_D(\text{IMP}) > \tau_D(\text{GMP})$<br>P = 0.047                                                                | $R_{D0}(\text{IMP}) > R_{D0}(\text{GMP})$<br>P = 0.035                               | $\tau_D/R_{D0}(\text{IMP}) = \tau_D/R_{D0}(\text{GMP})$                                     |
| T105A                          | $\tau_D(\text{IMP}) > \tau_D(\text{GMP})$<br>P = 0.037                                                                | $R_{D0}(\text{IMP}) > R_{D0}(\text{GMP})$<br>P = 0.027                               | $\tau_D/R_{D0}(\text{IMP}) = \tau_D/R_{D0}(\text{GMP})$                                     |
| D129A                          | –                                                                                                                     | –                                                                                    | –                                                                                           |
| Y318F                          | $\tau_D(\text{IMP}) = \tau_D(\text{GMP})$                                                                             | $R_{D0}(\text{IMP}) > R_{D0}(\text{GMP})$<br>P = 0.030                               | $\tau_D/R_{D0}(\text{HT}) < \tau_D/R_{D0}(\text{DA})$<br>P = 0.016                          |
| <i>NADP<sup>+</sup> mono-P</i> |                                                                                                                       |                                                                                      |                                                                                             |
| K77A                           | $\tau_D(\text{NADP}^+)_{\text{HT}} = \tau_D(\text{NADP}^+)_{\text{DA}}$<br>$\tau_D/R_{D0}(\text{NADP}^+)_{\text{DA}}$ | $R_{D0}(\text{NADP}^+)_{\text{HA}} = R_{D0}(\text{NADP}^+)_{\text{DA}}$              | $\tau_D/R_{D0}(\text{NADP}^+)_{\text{HA}} >$<br>P = 0.0001                                  |
| T105A                          | $\tau_D(\text{NADP}^+)_{\text{HT}} = \tau_D(\text{NADP}^+)_{\text{DA}}$<br>$(\text{NADP}^+)_{\text{DA}}$              | $R_{D0}(\text{NADP}^+)_{\text{HA}} = R_{D0}(\text{NADP}^+)_{\text{DA}}$              | $\tau_D/R_{D0}(\text{NADP}^+)_{\text{HA}} = \tau_D/R_{D0}$                                  |
| D129A                          | $\tau_D(\text{NADP}^+)_{\text{HT}} = \tau_D(\text{NADP}^+)_{\text{DA}}$<br>$(\text{NADP}^+)_{\text{DA}}$              | $R_{D0}(\text{NADP}^+)_{\text{HA}} = R_{D0}(\text{NADP}^+)_{\text{DA}}$              | $\tau_D/R_{D0}(\text{NADP}^+)_{\text{HA}} = \tau_D/R_{D0}$                                  |
| Y318F                          | $\tau_D(\text{NADP}^+)_{\text{HT}} > \tau_D(\text{NADP}^+)_{\text{DA}}$<br>$(\text{NADP}^+)_{\text{DA}}$<br>P = 0.022 | $R_{D0}(\text{NADP}^+)_{\text{HA}} > R_{D0}(\text{NADP}^+)_{\text{DA}}$<br>P = 0.024 | $\tau_D/R_{D0}(\text{NADP}^+)_{\text{HA}} < \tau_D/R_{D0}$<br>P = 0.0003                    |
| <i>NADP<sup>+</sup> PP-1</i>   |                                                                                                                       |                                                                                      |                                                                                             |
| K77A                           | $\tau_D(\text{PP-1})_{\text{HT}} = \tau_D(\text{PP-1})_{\text{DA}}$                                                   | $R_{D0}(\text{PP-1})_{\text{HA}} < R_{D0}(\text{PP-1})_{\text{DA}}$<br>P = 0.0014    | $\tau/R_{D0}(\text{PP-1})_{\text{HT}} > \tau/R_{D0}(\text{PP-1})_{\text{DA}}$<br>P = 0.0078 |
| T105A                          | $\tau_D(\text{PP-1})_{\text{HT}} = \tau_D(\text{PP-1})_{\text{DA}}$                                                   | $R_{D0}(\text{PP-1})_{\text{HA}} = R_{D0}(\text{PP-1})_{\text{DA}}$                  | $\tau/R_{D0}(\text{PP-1})_{\text{HT}} = \tau/R_{D0}(\text{PP-1})_{\text{DA}}$               |
| D129A                          | $\tau_D(\text{PP-1})_{\text{HT}} = \tau_D(\text{PP-1})_{\text{DA}}$                                                   | $R_{D0}(\text{PP-1})_{\text{HA}} = R_{D0}(\text{PP-1})_{\text{DA}}$                  | $\tau/R_{D0}(\text{PP-1})_{\text{HT}} = \tau/R_{D0}(\text{PP-1})_{\text{DA}}$               |
| Y318F                          | $\tau_D(\text{PP-1})_{\text{HT}} > \tau_D(\text{PP-1})_{\text{DA}}$<br>P = 0.017                                      | $R_{D0}(\text{PP-1})_{\text{HA}} > R_{D0}(\text{PP-1})_{\text{DA}}$<br>P = 0.029     | $\tau/R_{D0}(\text{PP-1})_{\text{HT}} = \tau/R_{D0}(\text{PP-1})_{\text{DA}}$               |

<sup>a</sup> P values < 0.05 are given and the direction of the comparison of  $\tau_D$ ,  $R_{D0}$ , or  $\tau_D/R_{D0}$  is indicated for a given GMPR. These data should be compared to WT parameters in Table 1 of the main text.

<sup>b</sup> Since only one run of the DA had enough data to extract GMP parameters for this mutant, a statistical analysis of how the two substrates compare cannot be done.

**Table S3. Field cycling parameters organized in clusters. Green are hydride transfer complexes, pink are deamination complexes.** Data for D219A, dIMP and dGMP complexes are from <sup>3</sup>. For K77A and D219A, cluster analysis utilized values of  $R_{D0}$  and  $\tau_D/R_{D0}$  corrected for fraction bound (corrected values shown in parentheses).

| Enzyme             | (d)NMP             |                                   |                                               | NADP monoP          |                                       |                                               | NADP PP1           |                                       |                                               |
|--------------------|--------------------|-----------------------------------|-----------------------------------------------|---------------------|---------------------------------------|-----------------------------------------------|--------------------|---------------------------------------|-----------------------------------------------|
|                    | $\tau_D$ (ns)      | $R_{D0}$ (s <sup>-1</sup> )       | $\tau_D/R_{D0} \times 10^8$ (s <sup>2</sup> ) | $\tau_D$ (ns)       | $R_{D0}$ (s <sup>-1</sup> )           | $\tau_D/R_{D0} \times 10^8$ (s <sup>2</sup> ) | $\tau_D$ (ns)      | $R_{D0}$ (s <sup>-1</sup> )           | $\tau_D/R_{D0} \times 10^8$ (s <sup>2</sup> ) |
| <b>Cluster 1</b>   |                    |                                   |                                               |                     |                                       |                                               |                    |                                       |                                               |
| WT                 | 55±12              | 1.8±0.9                           | 3.3±1.2                                       | 103±23              | 2.8±0.2                               | 3.8±1.0                                       | 88±5               | 1.4±0.3                               | 6.6±1.2                                       |
| T105A              | 55±14              | 2.1±0.5                           | 2.7±1.2                                       | 67±18               | 1.5±0.7                               | 5.0±2.4                                       | 102±14             | 0.99±0.47                             | 12±6                                          |
| Y318F              | 55±3 <sup>a</sup>  | 4.0±1.6 <sup>a</sup>              | 1.4±0.6 <sup>a</sup>                          | 118±29 <sup>a</sup> | 4.6±1.5 <sup>a</sup>                  | 2.6±0.2 <sup>a</sup>                          | 102±11             | 1.8±0.2                               | 5.58±0.02                                     |
| D219A              | 70±26              | 1.7±0.3<br>(4.3±0.7) <sup>c</sup> | 4.1±1.7<br>(1.6±0.7) <sup>c</sup>             | 139±9               | 1.95±0.02<br>(4.88±0.05) <sup>c</sup> | 7.1±0.5<br>(2.8±0.2) <sup>c</sup>             | 113±6              | 0.60±0.02<br>(1.50±0.05) <sup>c</sup> | 18±1<br>(7.2±0.4) <sup>c</sup>                |
| K77A <sup>a</sup>  | 26±1               | 0.64±0.16                         | 4.1±1.1                                       | 121±35              | 2.02±0.77<br>(3.3±1.2) <sup>d</sup>   | 6.1±0.5<br>(3.2±1.3) <sup>d</sup>             | 161±58             | 1.3±0.3<br>(2.1±0.5) <sup>d</sup>     | 12.5±2.1<br>(7.8±1.3) <sup>d</sup>            |
| <b>Cluster 2</b>   |                    |                                   |                                               |                     |                                       |                                               |                    |                                       |                                               |
| WT                 | 72±13              | 0.3±0.02                          | 24±5                                          | 47±11               | 0.6±0.1                               | 7.5±2.8                                       | 44±6               | 0.49±0.11                             | 9.5±2.1                                       |
| WT(dIMP)           | 75±30              | 0.8±0.3                           | 10±5                                          | 92±18               | 0.8±0.2                               | 11±3                                          | 61±23              | 0.3±0.1                               | 18±8                                          |
| T105A              | 16±5 <sup>a</sup>  | 0.4±0.3 <sup>a</sup>              | 3.4±0.8 <sup>a</sup>                          | 49±1 <sup>a</sup>   | 0.79±0.03 <sup>a</sup>                | 6.2±0.4 <sup>a</sup>                          | 56±15 <sup>a</sup> | 0.64±0.16 <sup>a</sup>                | 8.8±0.7 <sup>a</sup>                          |
| Y318F              | 46±13              | 0.7±0.1                           | 6.5±1.3                                       | 49±5                | 1.2±0.1                               | 4.1±0.1                                       | 61±9               | 1.2±0.2                               | 5.0±0.6                                       |
| WT(dGMP)           | 43±12              | 0.4±0.2                           | 11±6                                          | 75±8                | 1.5±0.5                               | 5±2                                           | 101±27             | 1.6±0.5                               | 6.3±3                                         |
| <b>Cluster 3</b>   |                    |                                   |                                               |                     |                                       |                                               |                    |                                       |                                               |
| D129A <sup>a</sup> | 126±20             | 1.4±0.7                           | 10±6                                          | 131±28              | 1.6±0.5                               | 8.6±1.0                                       | 160±1              | 0.79±0.11                             | 20±3                                          |
| D129A <sup>a</sup> | 48±18 <sup>b</sup> | 0.6±0.1 <sup>b</sup>              | 8.7±0.4 <sup>b</sup>                          | 100±2               | 1.42±0.03                             | 7.1±0.3                                       | 142±40             | 0.66±0.11                             | 21±2                                          |
| K77A <sup>a</sup>  | 74±23              | 2.4±0.7                           | 3.1±0.3                                       | 124±14              | 1.1±0.2<br>(1.6±0.3) <sup>c</sup>     | 11±1<br>(7.7±0.7) <sup>c</sup>                | 147±31             | 0.44±0.06<br>(0.66±0.09) <sup>c</sup> | 28±18<br>(19±12) <sup>c</sup>                 |
| D219A              | 120±34             | 3.8±1.2                           | 3.1±1.3                                       | 125±8               | 2.3±0.3                               | 5.3±0.8                                       | 137±32             | 0.86±0.15                             | 16±5                                          |

## REFERENCES

- [1] de Hoon, M. J., Imoto, S., Nolan, J., and Miyano, S. (2004) Open source clustering software, *Bioinformatics* 20, 1453-1454.
- [2] Saldanha, A. J. (2004) Java Treeview--extensible visualization of microarray data, *Bioinformatics* 20, 3246-3248.
- [3] Rosenberg, M. M., Redfield, A. G., Roberts, M. F., and Hedstrom, L. (2018) Dynamic Characteristics of Guanosine-5'-monophosphate Reductase Complexes Revealed by High-Resolution (31)P Field-Cycling NMR Relaxometry, *Biochemistry* 57, 3146-3154.
